# Supplementary material
Source: PubMed Central journal article supplement (PMC9110322)
Supplement: JZhejiangUnivSciB-23-5-382-s001.pdf [file JZhejiangUnivSciB-23-5-382-s001.pdf]

## Supplementary information

### Can SpRY recognize any PAM in human cells?

Jinbin YE<sup>1</sup>, Haitao XI<sup>1</sup>, Yilu CHEN<sup>1</sup>, Qishu CHEN<sup>1</sup>, Xiaosheng LU<sup>1</sup>, Jineng LV<sup>2</sup>, Yamin CHEN<sup>2</sup>, Feng GU\*, Junzhao ZHAO<sup>1</sup>

<sup>1</sup>Reproduction Center, Department of Obstetrics and Gynecology, the Second Affiliated Hospital and Yuying Children's Hospital of Wenzhou Medical University, Wenzhou 325000, China

<sup>2</sup>School of Ophthalmology and Optometry, Eye Hospital, Wenzhou Medical University, State Key Laboratory and Key Laboratory of Vision Science, Ministry of Health and Zhejiang Provincial Key Laboratory of Ophthalmology and Optometry, Wenzhou 325000, China

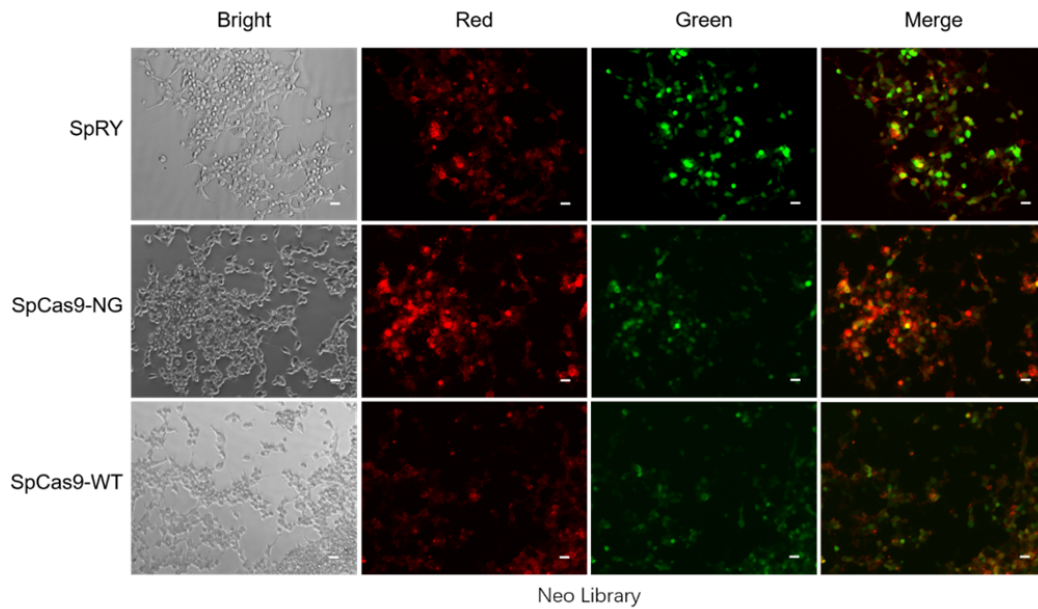

**Fig. S1** The results of PAM-DOSE via fluorescent microscopy at Neo site. HEK-293 cells were co-transfected with a pmTmG-N<sub>4</sub>-Neo PAM library, and the plasmids expressing Cas and sgRNA for the cleavage and images were obtained 48 h after transfection. Scale bar is 100  $\mu$ m.

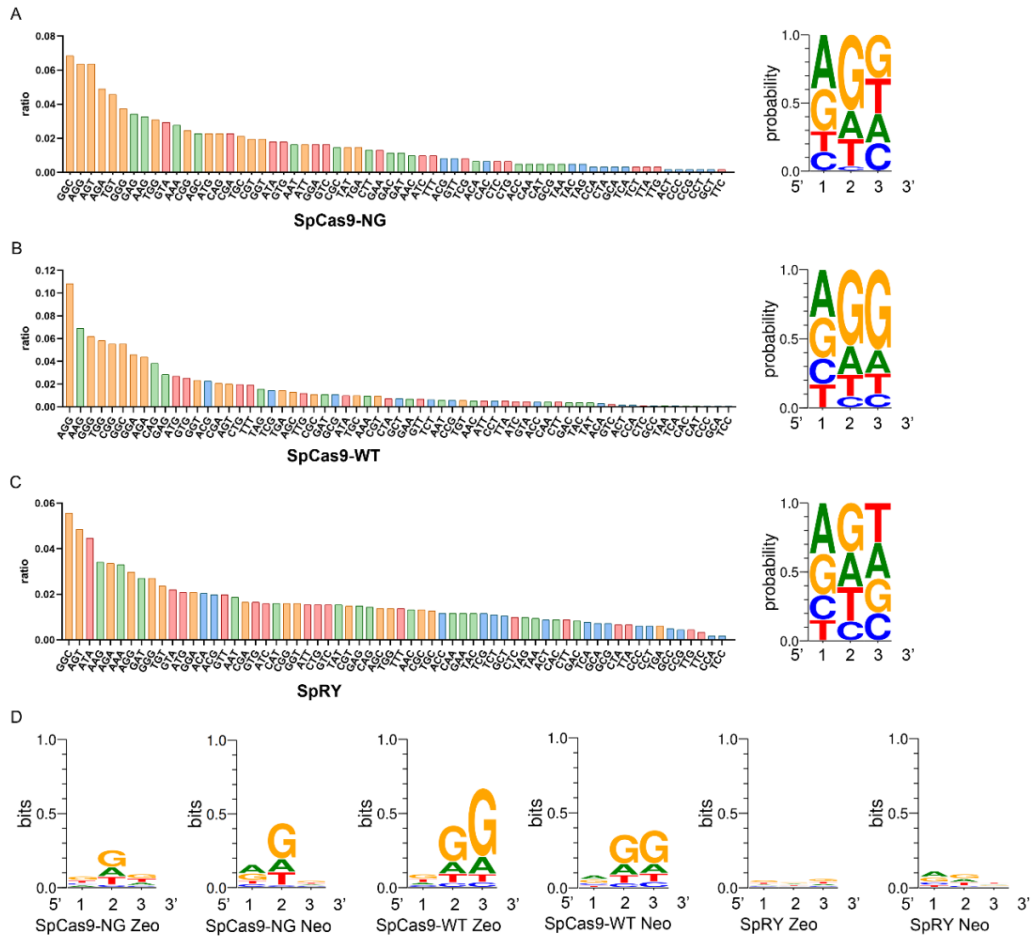

**Fig. S2** The NGS data of SpCas9-NG, SpCas9-WT, and SpRY using PAM-DOSE at the Neo site. (A, B, C) Ratio of recognized PAMs calculated and sequence logo based on NGS results at the Neo site of SpCas9-NG, SpCas9-WT and SpRY. (D) The sequence logo of SpCas9-NG, SpCas9-WT and SpRY at the Zeo and Neo site (Y axis was bits).

**Table S1 Oligonucleotide sequences for plasmids construction of Cas9 variants**

| Primer name | Primer sequence                              |
|-------------|----------------------------------------------|
| SpRY-F1     | TACTCCCACAGGTGAGCGG                          |
| SpRY-R1     | GTTGGTGCCGATGTCCAGG                          |
| SpRY-F2     | CCTGGACATCGGCACCAACTCTGTGG                   |
| SpRY-R2     | CGAGCTCTAGGAATTCTTAGACTTTCCTCTTCTTCTTGGGCTCG |

**Table S2 Target sequence of three mTmG PAM libraries with random PAMs**

| Name  | Sequence                                                             |
|-------|----------------------------------------------------------------------|
| Neo   | CGCGTAGTGGCGGGCGACTTGACAAGCGTGCT <u>NNNN</u> CCTCGTACCCGCGGACTAGTACG |
| Zeo   | CGCGTAGTGGCGGGAGGACGACTTCGCCGGTG <u>NNNN</u> CCTCGTACCCGCGGACTAGTACG |
| sloxP | TAATAACTTCGTATAGCATACTAG <u>GGT</u>                                  |

**Table S3 Oligonucleotide sequences for sgRNA construction targeting Neo, Zeo, and sloxP**

| Name           | SgRNA                      |
|----------------|----------------------------|
| SaCas9 sloxP F | CACCGTAATAACTTCGTATAGCATAC |
| SaCas9 sloxP R | AAACGTATGCTATACGAAGTTATTAC |
| SpCas9 Neo F   | CACCGGGCGACTTGACAAGCGTGCT  |
| SpCas9 Neo R   | AAACAGCACGCTTGTC AAGTCGCCC |
| SpCas9 Zeo F   | CACCGGGAGGACGACTTCGCCGGTG  |
| SpCas9 Zeo R   | AAACCACCGGCGAAGTCGTCCTCCC  |

**Table S4 *EGFP* target sequences**

| <b>Name</b> | <b>EGFP target sequence</b> | <b>PAM</b> |
|-------------|-----------------------------|------------|
| sgRNA-AAAC  | GTCGAGCTGGACGGCGACGT        | AAAC       |
| sgRNA-AAAG  | GCACCCAGTCCGCCCTGAGC        | AAAG       |
| sgRNA-AACA  | TCGACTTCAAGGAGGACGGC        | AACA       |
| sgRNA-GACG  | TGCCCATCCTGGTCGAGCTG        | GACG       |
| sgRNA-AAGA  | TCAAGGACGACGGCAACTAC        | AAGA       |
| sgRNA-GAGA  | CCCTGAGCAAAGACCCCAAC        | GAGA       |
| sgRNA-TAGG  | ACTTCAGGGTCAGTTGCCG         | TAGG       |
| sgRNA-CATC  | CTGTTACCCGGGTGGTGCC         | CATC       |
| sgRNA-GATG  | TGTCCGGCGAGGGCGAGGGC        | GATG       |
| sgRNA-ACAA  | GGACGGCGACGTAAACGGCC        | ACAA       |
| sgRNA-GCAC  | GCTGACCCTGAAGTTCATCT        | GCAC       |
| sgRNA-ACCA  | AAGGCTACGTCCAGGAGCGC        | ACCA       |
| sgRNA-ACCG  | GCAAGGGCGAGGAGCTGTT         | ACCG       |
| sgRNA-CCCA  | AGCTGTTACCCGGGTGGTG         | CCCA       |
| sgRNA-GCCC  | GAGCTGTTACCCGGGTGGT         | GCCC       |
| sgRNA-TCCA  | CGCCATGCCCCGAAGGCTACG       | TCCA       |
| sgRNA-TCCG  | ACGGCCACAAGTTCAGCGTG        | TCCG       |
| sgRNA-ACGG  | CGAGCTGGACGGCGACGTAA        | ACGG       |
| sgRNA-TCGG  | CTACCAGCAGAACACCCCA         | TCGG       |
| sgRNA-TCTG  | CAAGCTGACCCTGAAGTTCA        | TCTG       |
| sgRNA-ACTT  | CGACCACATGAAGCAGCACG        | ACTT       |
| sgRNA-TGAA  | CACCTACGGCAAGCTGACCC        | TGAA       |
| sgRNA-AGAC  | CAAGGACGACGGCAACTACA        | AGAC       |
| sgRNA-GGCA  | TGAAGTTCATCTGCACCACC        | GGCA       |
| sgRNA-TGCA  | AGCTGACCCTGAAGTTCATC        | TGCA       |
| sgRNA-CGCC  | CAGCACGACTTCTTCAAGTC        | CGCC       |
| sgRNA-TGCC  | GGAGCTGTTACCCGGGTGG         | TGCC       |
| sgRNA-GGCG  | CCATCCTGGTCGAGCTGGAC        | GGCG       |
| sgRNA-AGCT  | GTTTATCTGCACCACCGCA         | AGCT       |
| sgRNA-CGCT  | ACGGCGTGCAGTGCTTCAGC        | CGCT       |
| sgRNA-CGGA  | GGCATCGCCCTCGCCCTCGC        | CGGA       |
| sgRNA-GGGA  | TGGAGTTCGTGACCGCCGCC        | GGGA       |
| sgRNA-TGGC  | CCGGCAAGCTGCCCGTGCC         | TGGC       |
| sgRNA-GGGT  | GGGCGAGGAGCTGTTACCG         | GGGT       |
| sgRNA-TGTC  | AAACGGCCACAAGTTCAGCG        | TGTC       |
| sgRNA-AGTT  | CGGCGACGTAAACGGCCACA        | AGTT       |
| sgRNA-CGTT  | GGACACGCTGAACTTGTGGC        | CGTT       |
| sgRNA-GGTT  | GATGCCCTTCAGCTCGATGC        | GGTT       |
| sgRNA-GTAC  | ATCCTGGGGCACAAGCTGGA        | GTAC       |
| sgRNA-ATAT  | CTACAACAGCCACAACGTCT        | ATAT       |
| sgRNA-GTCC  | AACGGCCACAAGTTCAGCGT        | GTCC       |
| sgRNA-GTCT  | ACAACACTACAACAGCCACAAC      | GTCT       |
| sgRNA-TTGA  | AGCCTTCGGGCATGGCGGAC        | TTGA       |
| sgRNA-GTGT  | TAAACGGCCACAAGTTCAGC        | GTGT       |
| sgRNA-GTTG  | ACCTCGGCGCGGTCTTGTA         | GTTG       |
| sgRNA-GTTT  | GACACGCTGAACTTGTGGCC        | GTTT       |

**Table S5 Oligonucleotide sequences for sgRNA construction targeting *EGFP* gene**

| <b>Primer name</b> | <b>Primer sequence</b>    |
|--------------------|---------------------------|
| sgRNA-AACA-F       | CACCGTCGACTTCAAGGAGGACGGC |
| sgRNA-AACA-R       | AAACGCCGTCCTCCTTGAAGTCGAC |
| sgRNA-AAGA-F       | CACCGTCAAGGACGACGGCAACTAC |
| sgRNA-AAGA-R       | AAACGTAGTTGCCGTCGTCCTTGAC |
| sgRNA-ACAA-F       | CACCGGGACGCGCAGCTAAACGGCC |
| sgRNA-ACAA-R       | AAACGGCCGTTTACGTCGCCGTC   |
| sgRNA-GACG-R       | CACCGTGCCATCCTGGTCGAGCTG  |
| sgRNA-GACG-R       | AAACCAGCTCGACCAGGATGGGCAC |
| sgRNA-CGGA-F       | CACCGGGCATCGCCCTCGCCCTCGC |
| sgRNA-CGGA-R       | AAACGCGAGGGCGAGGGCGATGCC  |
| sgRNA-GAGA-F       | CACCGCCCTGAGCAAAGACCCCAAC |
| sgRNA-GAGA-R       | AAACGTTGGGGTCTTTGCTCAGGGC |
| sgRNA-GGCA-F       | CACCGTGAAGTTCATCTGCACCACC |
| sgRNA-GGCA-R       | AAACGGTGGTGCAGATGAACTTCAC |
| sgRNA-GGGA-F       | CACCGTGGAGTTCGTGACCGCCGCC |
| sgRNA-GGGA-R       | AAACGGCGGGGTCACGAACTCCAC  |
| sgRNA-ACCA-F       | CACCGAAGGCTACGTCCAGGAGCGC |
| sgRNA-ACCA-R       | AAACGCGCTCCTGGACGTAGCCTTC |
| sgRNA-ACCG-F       | CACCGGCAAGGGCGAGGAGCTGTTC |
| sgRNA-ACCG-R       | AAACGAACAGCTCCTCGCCCTTGCC |
| sgRNA-CCCA-F       | CACCGAGCTGTTACCGGGGTGGTG  |
| sgRNA-CCCA-R       | AAACCACCACCCCGGTGAACAGCTC |
| sgRNA-GCCC-F       | CACCGGAGCTGTTACCGGGGTGGT  |
| sgRNA-GCCC-R       | AAACACCACCCCGGTGAACAGCTCC |
| sgRNA-TCCA-F       | CACCGCGCCATGCCCCAAGGCTACG |
| sgRNA-TCCA-R       | AAACCGTAGCCTTCGGGCATGGCGC |
| sgRNA-TCCG-F       | CACCGACGGCCACAAGTTCAGCGTG |
| sgRNA-TCCG-R       | AAACCACGCTGAACTTGTGGCCGTC |
| sgRNA-TGAA-F       | CACCGCACCTACGGCAAGCTGACCC |
| sgRNA-TGAA-R       | AAACGGGTCAGCTTGCCGTAGGTGC |
| sgRNA-TGCA-F       | CACCGAGCTGACCCTGAAGTTCATC |
| sgRNA-TGCA-R       | AAACGATGAACTTCAGGGTCAGCTC |
| sgRNA-TTGA-F       | CACCGAGCCTTCGGGCATGGCGGAC |
| sgRNA-TTGA-R       | AAACGTCCGCCATGCCCCAAGGCTC |
| sgRNA-AAAC-F       | CACCGGTCGAGCTGGACGGCGACGT |
| sgRNA-AAAC-R       | AAACACGTCGCCGTCCAGCTCGACC |
| sgRNA-AGAC-F       | CACCGCAAGGACGACGGCAACTACA |
| sgRNA-AGAC-R       | AAACTGTAGTTGCCGTCGTCCTTGC |
| sgRNA-CATC-F       | CACCGCTGTTACCGGGGTGGTGCC  |
| sgRNA-CATC-R       | AAACGACAAGTGCCCCACCACGGC  |
| sgRNA-CGCC-F       | CACCGCAGCACGACTTCTCAAGTC  |
| sgRNA-CGCC-R       | AAACGACTTGAAGAAGTCGTGCTGC |
| sgRNA-GCAC-F       | CACCGGCTGACCCTGAAGTTCATCT |
| sgRNA-GCAC-R       | AAACAGATGAACTTCAGGGTCAGCC |
| sgRNA-GTAC-F       | CACCGATCCTGGGGCACAAGCTGGA |
| sgRNA-GTAC-R       | AAACTCCAGCTTGTGCCCCAGGATC |
| sgRNA-GTCC-F       | CACCGAACGGCCACAAGTTCAGCGT |
| sgRNA-GTCC-R       | AAACACGCTGAACTTGTGGCCGTTC |

---

|              |                             |
|--------------|-----------------------------|
| sgRNA-TGCC-F | CACCGGGAGCTGTTACCGGGGTGG    |
| sgRNA-TGCC-R | AAACCCACCCCGGTGAACAGCTCCC   |
| sgRNA-TGGC-F | CACCGCCGGCAAGCTGCCCGTGCCC   |
| sgRNA-TGGC-R | AAACGGGCACGGCAGCTTGCCGGC    |
| sgRNA-TGTC-F | CACCGAAACGGCCACAAGTTCAGCG   |
| sgRNA-TGTC-R | AAACCGCTGAACTTGTGGCCGTTTC   |
| sgRNA-AAAG-F | CACCGGCACCCAGTCCGCCCTGAGC   |
| sgRNA-AAAG-R | AAACGCTCAGGGCGGACTGGGTGCC   |
| sgRNA-ACGG-F | CACCGCGAGCTGGACGGCGACGTAA   |
| sgRNA-ACGG-R | AAACTTACGTCGCCGTCCAGCTCGC   |
| sgRNA-GATG-F | CACCGTGTCCGGCGAGGGCGAGGGC   |
| sgRNA-GATG-R | AAACGCCCTCGCCCTCGCCGGACAC   |
| sgRNA-GGCG-F | CACCGCCATCCTGGTCGAGCTGGAC   |
| sgRNA-GGCG-R | AAACGTCCAGCTCGACCAGGATGGC   |
| sgRNA-GTTG-F | CACCGACCTCGGGCGGGTCTTGTA    |
| sgRNA-GTTG-R | AAACTACAAGACCCGCGCCGAGGTC   |
| sgRNA-TAGG-F | CACCGACTTCAGGGTCAGCTTGCCG   |
| sgRNA-TAGG-R | AAACCGGCAAGCTGACCCTGAAGTC   |
| sgRNA-TCGG-F | CACCGCTACCAGCAGAACACCCCCA   |
| sgRNA-TCGG-R | AAACTGGGGGTGTTCTGCTGGTAGC   |
| sgRNA-TCTG-F | CACCGCAAGCTGACCCTGAAGTTCA   |
| sgRNA-TCTG-R | AAACTGAACTTCAGGGTCAGCTTGC   |
| sgRNA-ACTT-F | CACCGCGACCACATGAAGCAGCACG   |
| sgRNA-ACTT-R | AAACCGTGCTGCTTCATGTGGTCGC   |
| sgRNA-AGCT-F | CACCGGTTTCATCTGCACCACCGGCA  |
| sgRNA-AGCT-R | AAACTGCCGGTGGTGCAGATGAACC   |
| sgRNA-AGTT-F | CACCGCGGCGACGTAAACGGCCACA   |
| sgRNA-AGTT-R | AAACTGTGGCCGTTTACGTCGCCGC   |
| sgRNA-ATAT-F | CACCGCTACAACAGCCACAACGTCT   |
| sgRNA-ATAT-R | AAACAGACGTTGTGGCTGTTGTAGC   |
| sgRNA-CGCT-F | CACCGACGGCGTGCAGTGCTTCAGC   |
| sgRNA-CGCT-R | AAACGCTGAAGCACTGCACGCCGTC   |
| sgRNA-CGTT-F | CACCGGGACACGCTGAACTTGTGGC   |
| sgRNA-CGTT-R | AAACGCCACAAGTTCAGCGTGTC     |
| sgRNA-GGGT-F | CACCGGGGCGAGGAGCTGTTACCG    |
| sgRNA-GGGT-R | AAACCGGTGAACAGCTCCTCGCCCC   |
| sgRNA-GGTT-F | CACCGGATGCCCTTCAGCTCGATGC   |
| sgRNA-GGTT-R | AAACGCATCGAGCTGAAGGGCATCC   |
| sgRNA-GTCT-F | CACCGACAACACTACAACAGCCACAAC |
| sgRNA-GTCT-R | AAACGTTGTGGCTGTTGTAGTTGTC   |
| sgRNA-GTGT-F | CACCGTAAACGGCCACAAGTTCAGC   |
| sgRNA-GTGT-R | AAACGCTGAACTTGTGGCCGTTTAC   |
| sgRNA-GTTT-F | CACCGGACACGCTGAACTTGTGGCC   |
| sgRNA-GTTT-R | AAACGGCCACAAGTTCAGCGTGTC    |

---

**Table S6 PCR Primers for Sanger sequencing and NGS**

| Name     | Primer                                                       |
|----------|--------------------------------------------------------------|
| Sanger F | AATTCGTACTAGTCCGCGGGTACGAGG                                  |
| Sanger R | GGGACTTCCTTTGTCCCAAATC                                       |
| NGS F1   | CCCTACACGACGCTCTCCGATCTAATTCGTACTAGTCCGCGGGTACGAGG           |
| NGS R1   | GACTGGAGTTCAGACGTGTGCTCTCCGATCTGGGCTCGACACTAGTAGATCTCCTA     |
| NGS F2   | AATGATACGGCGACCACCGAGATCTACACTCTTCCCTACACGACGCTCTCCGATCTA    |
| NGS R2   | CAAGCAGAAGACGGCATAACGAGATCGCTGATCGTGACTGGAGTTCAGACGTGTGCTCTT |

**Table S7 The raw read counts of NGS for each PAM via PAM-DOSE**

|               | PAM | 3 | A   | A   | A   | A  | C  | C  | C   | C  | G   | G   | G   | G   | T  | T   | T  | T   |
|---------------|-----|---|-----|-----|-----|----|----|----|-----|----|-----|-----|-----|-----|----|-----|----|-----|
|               | 1   | 2 | 4   | A   | C   | G  | A  | C  | G   | T  | A   | C   | G   | T   | A  | C   | G  | T   |
| SpRY Zeo      | NA  |   | 4   | 19  | 12  | 9  | 13 | 5  | 12  | 4  | 17  | 22  | 6   | 12  | 8  | 8   | 20 | 3   |
|               | NC  |   | 6   | 7   | 4   | 7  | 10 | 4  | 4   | 9  | 4   | 11  | 10  | 14  | 1  | 18  | 11 | 6   |
|               | NG  |   | 14  | 6   | 14  | 12 | 7  | 4  | 8   | 7  | 13  | 15  | 17  | 15  | 13 | 12  | 14 | 31  |
|               | NT  |   | 9   | 13  | 7   | 10 | 10 | 6  | 3   | 4  | 12  | 6   | 16  | 19  | 8  | 5   | 16 | 9   |
| SpRY Neo      | NA  |   | 53  | 24  | 23  | 19 | 23 | 20 | 19  | 14 | 46  | 25  | 46  | 16  | 40 | 39  | 30 | 31  |
|               | NC  |   | 26  | 9   | 29  | 3  | 11 | 11 | 14  | 8  | 16  | 25  | 18  | 19  | 8  | 17  | 19 | 22  |
|               | NG  |   | 34  | 34  | 40  | 32 | 23 | 14 | 116 | 20 | 55  | 28  | 31  | 43  | 30 | 35  | 33 | 89  |
|               | NT  |   | 39  | 50  | 36  | 20 | 17 | 28 | 20  | 16 | 34  | 20  | 25  | 25  | 15 | 20  | 36 | 34  |
| SpCas9-NG Zeo | NA  |   | 23  | 48  | 28  | 28 | 35 | 9  | 47  | 7  | 54  | 71  | 22  | 79  | 44 | 60  | 38 | 33  |
|               | NC  |   | 3   | 17  | 3   | 12 | 5  | 5  | 5   | 15 | 7   | 12  | 21  | 24  | 5  | 7   | 31 | 7   |
|               | NG  |   | 78  | 48  | 107 | 65 | 27 | 39 | 57  | 42 | 64  | 64  | 76  | 86  | 67 | 80  | 85 | 100 |
|               | NT  |   | 28  | 35  | 29  | 14 | 21 | 13 | 10  | 13 | 52  | 35  | 75  | 81  | 18 | 15  | 49 | 28  |
| SpCas9-NG Neo | NA  |   | 16  | 3   | 8   | 4  | 8  | 3  | 7   | 2  | 19  | 12  | 23  | 4   | 5  | 2   | 17 | 5   |
|               | NC  |   | 3   | 0   | 5   | 2  | 2  | 0  | 1   | 1  | 4   | 4   | 5   | 1   | 0  | 2   | 0  | 3   |
|               | NG  |   | 11  | 20  | 19  | 13 | 10 | 9  | 50  | 9  | 27  | 18  | 23  | 28  | 16 | 16  | 29 | 30  |
|               | NT  |   | 7   | 10  | 15  | 1  | 4  | 2  | 12  | 3  | 6   | 3   | 12  | 10  | 7  | 6   | 11 | 5   |
| SpCas9-WT Zeo | NA  |   | 4   | 25  | 16  | 13 | 8  | 1  | 9   | 1  | 121 | 171 | 50  | 142 | 10 | 17  | 17 | 8   |
|               | NC  |   | 1   | 14  | 12  | 7  | 7  | 13 | 0   | 27 | 17  | 15  | 84  | 35  | 3  | 7   | 18 | 6   |
|               | NG  |   | 147 | 100 | 330 | 62 | 19 | 41 | 53  | 54 | 344 | 145 | 250 | 237 | 40 | 187 | 77 | 81  |
|               | NT  |   | 4   | 59  | 5   | 14 | 6  | 9  | 2   | 5  | 52  | 69  |     | 125 | 4  | 13  | 17 | 11  |
| SpCas9-WT Neo | NA  |   | 13  | 10  | 13  | 5  | 9  | 3  | 4   | 9  | 80  | 98  | 70  | 45  | 16 | 8   | 1  | 15  |
|               | NC  |   | 4   | 1   | 7   | 0  | 4  | 0  | 8   | 0  | 8   | 36  | 37  | 23  | 16 | 11  | 3  | 9   |
|               | NG  |   | 58  | 74  | 72  | 38 | 27 | 40 | 93  | 12 | 142 | 128 | 119 | 161 | 23 | 18  | 28 | 44  |
|               | NT  |   | 22  | 13  | 6   | 11 | 5  | 3  | 4   | 3  | 30  | 38  | 53  | 41  | 40 | 2   | 12 | 14  |
